# Supplementary material for: Rocket-Induced Lower Ionosphere Disturbances Derived from Measurements of VLF Transmitter Signals
Source: Copernicus journal article supplement (doi:10.5194/egusphere-2025-3338), 2025-07-21

31 October 2022. NWC recorded at Seattle (0.1 s resolution).

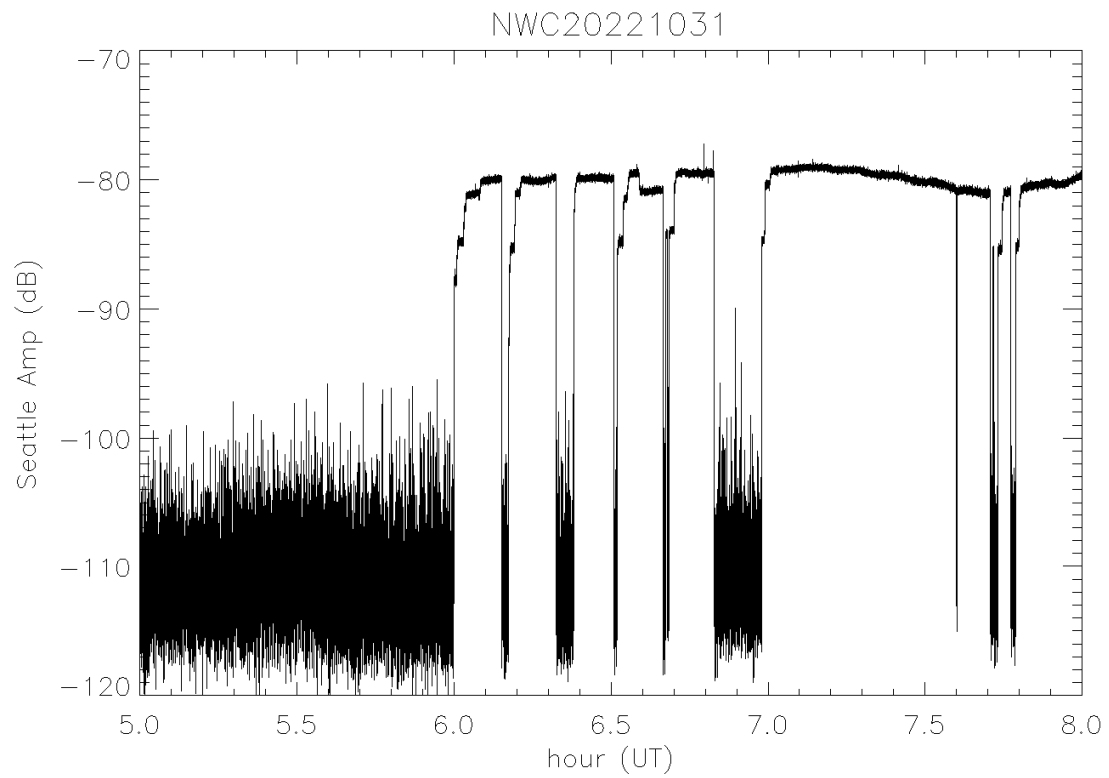

20 September 2021. NWC recorded at Seattle (0.1 s resolution):

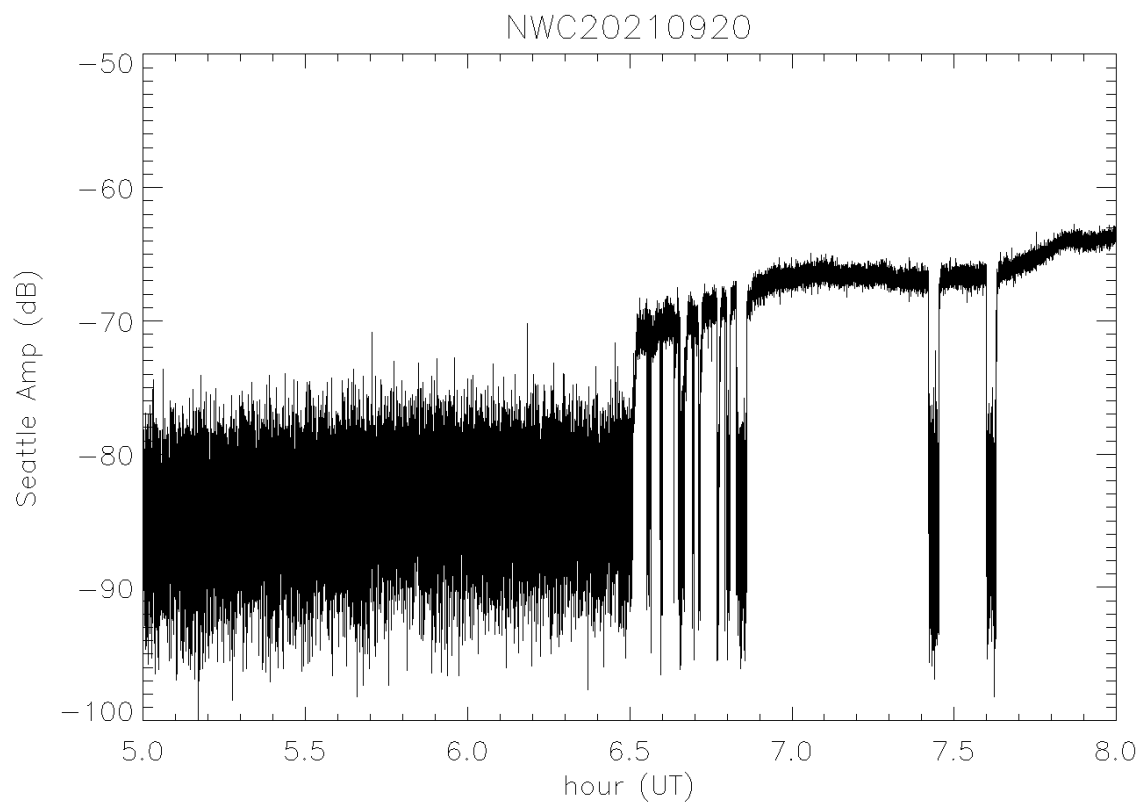

04 August 2022. NLK recorded at Seattle (0.1 s resolution):

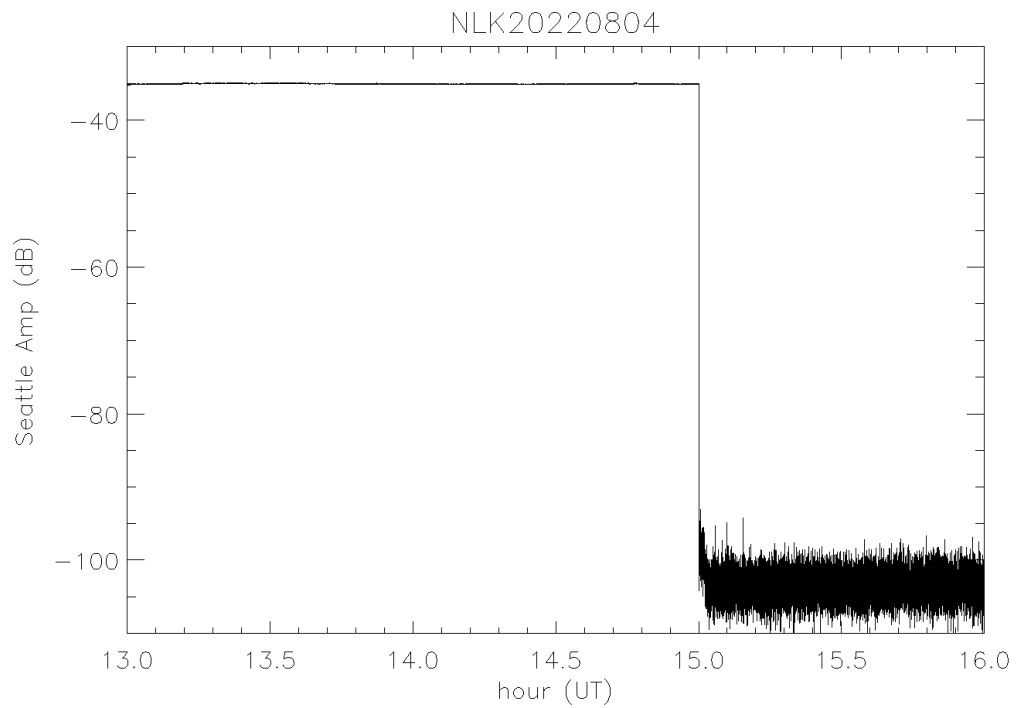

NLK to Rothera, Antarctica, (67°S, 68°W), 04 August 2022 (5 s resolution):

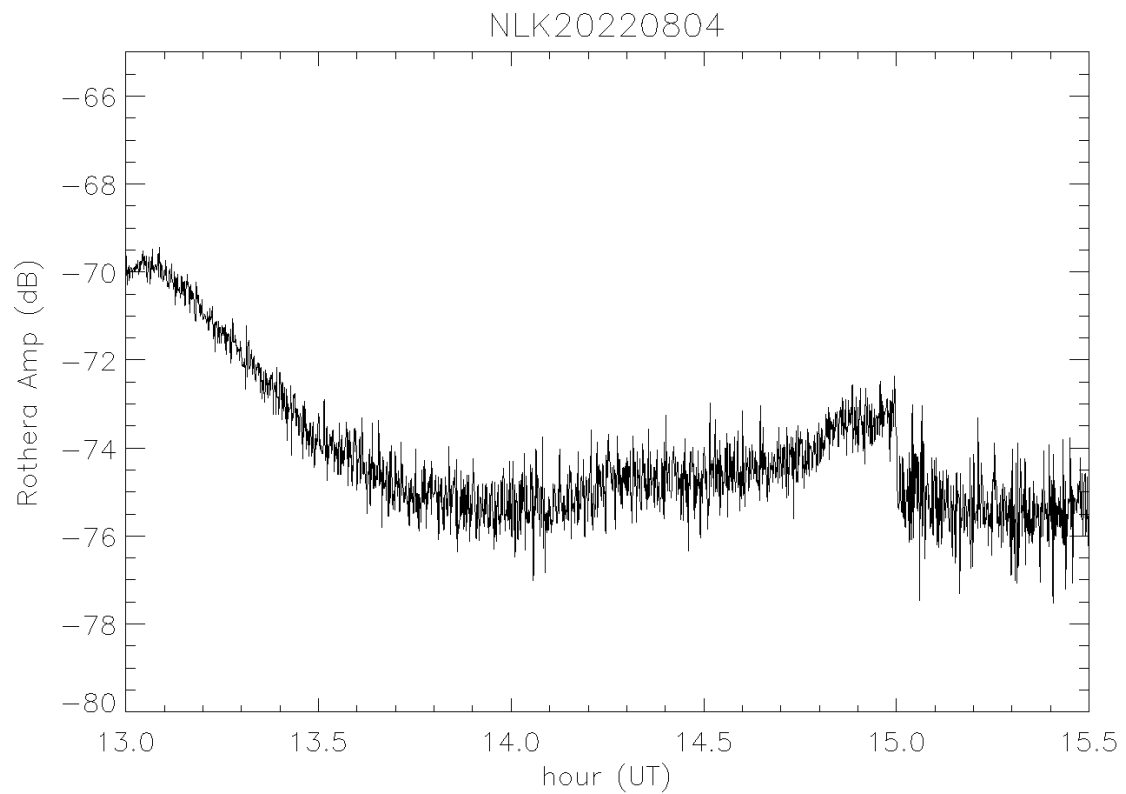

NML to Rothera, Antarctica, (67°S, 68°W), 04 August 2022 (5 s resolution):

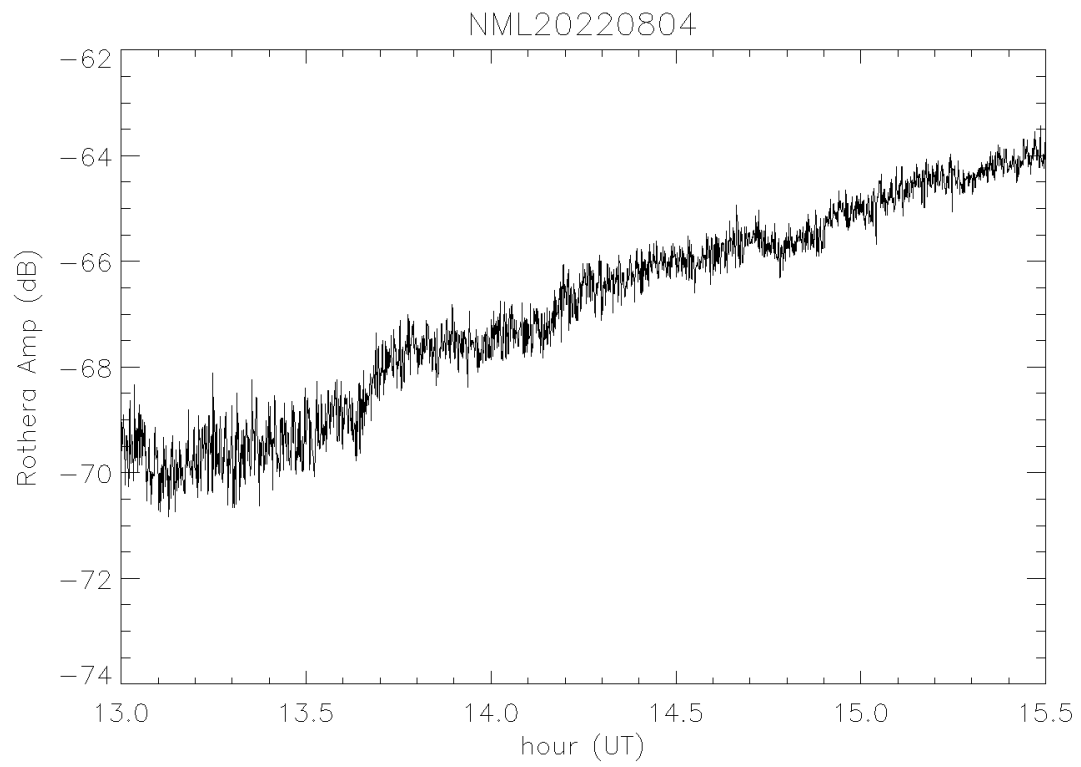

Supplement: Supplementary file [file egusphere-2025-3338-CC1-supplement.pdf]
